# Supplementary material for: The Ameliorating Effects of n-3 Polyunsaturated Fatty Acids on Liver Steatosis Induced by a High-Fat Methionine Choline-Deficient Diet in Mice
Source: MDPI journal article supplement (doi:10.3390/ijms242417226), 2023-12-07
Supplement: s1 [file s1]

## Supplementary Materials

**Table S1. The effect of n-3-PUFA on liver phospholipids - positive mass spectrometry ionization mode.**

|              | C                 |        | CP                |        | M                 |        | MP                |        |
|--------------|-------------------|--------|-------------------|--------|-------------------|--------|-------------------|--------|
|              | average intensity | SD (%) |
| LPC 16:0     | 5686.2            | 29.0   | 23702.3           | 38.0   | 12517.9           | 34.0   | 11849.5           | 39.4   |
| LPC 16:1     | 0.0               |        | 1129.9            | 71.6   | 969.5             | 81.2   | 584.6             | 41.0   |
| LPC 18:0     | 2434.3            | 20.9   | 8006.9            | 48.1   | 10420.4           | 50.1   | 10991.2           | 45.2   |
| LPC 18:1     | 1144.6            | 23.9   | 4539.4            | 42.7   | 9781.3            | 61.3   | 4852.9            | 46.9   |
| LPC 18:2     | 1004.1            | 9.1    | 5300.5            | 31.8   | 4102.4            | 80.5   | 1981.6            | 43.2   |
| LPC 18:3     | 1285.5            | 20.6   | 3088.6            | 19.0   | 2248.9            | 19.8   | 2200.2            | 22.1   |
| LPC 20:0     |                   |        |                   |        | 411.1             | 17.4   |                   |        |
| LPC 20:1     |                   |        |                   |        | 591.5             | 32.6   | 459.1             | 31.6   |
| LPC 20:3     | 633.6             | 18.2   | 1846.8            | 44.4   | 2571.2            | 29.7   | 2257.4            | 31.3   |
| LPC 20:4     | 648.8             | 18.3   | 1673.7            | 36.3   | 4901.6            | 64.4   | 1801.3            | 43.2   |
| LPC 20:5     |                   |        | 1828.2            | 17.9   | 1005.2            | 60.4   | 682.9             | 35.0   |
| LPC 22:4     |                   |        |                   |        | 499.7             | 27.9   |                   |        |
| LPC 22:6     | 382.7             | 6.4    | 3927.7            | 28.0   | 848.9             | 77.3   | 1845.7            | 42.4   |
| LPE 16:0     | 517.1             | 24.0   | 1414.9            | 45.8   | 1599.5            | 60.1   | 1178.0            | 45.5   |
| LPE 18:0     | 753.7             | 30.0   | 1689.5            | 48.4   | 3468.4            | 56.1   | 3077.4            | 46.6   |
| LPE 18:1     |                   |        | 594.1             | 25.7   | 2889.3            | 42.7   | 1195.2            | 51.5   |
| LPE 18:2     |                   |        | 385.8             | 40.8   | 674.5             | 45.9   | 423.3             | 29.4   |
| LPE 18:3     |                   |        |                   |        | 403.9             | 32.5   |                   |        |
| LPE 20:0     |                   |        | 430.7             | 40.8   | 371.0             | 14.6   |                   |        |
| LPE 20:1     |                   |        |                   |        | 381.7             | 44.7   |                   |        |
| LPE 20:3     |                   |        | 467.7             | 33.7   | 700.2             | 32.2   | 581.4             | 35.8   |
| LPE 20:4     |                   |        | 460.2             | 31.8   | 1311.7            | 54.5   | 495.2             | 42.6   |
| LPE 22:6     |                   |        | 1591.0            | 28.2   | 756.5             | 52.4   | 1271.0            | 50.8   |
| LPG 16:0     | 3549.7            | 12.6   | 2536.5            | 9.9    | 2912.9            | 9.2    | 2305.9            | 13.0   |
| LPG 16:0+NH4 | 647.7             | 27.0   | 489.8             | 11.7   | 515.9             | 12.8   | 421.7             | 12.7   |
| LPG 18:3     | 1180.7            | 9.4    | 951.2             | 8.6    | 1107.1            | 9.9    | 979.5             | 11.7   |
| LPI 24:0     | 2852.7            | 5.0    | 2415.4            | 5.1    | 2092.1            | 9.9    | 1724.7            | 19.4   |
| PC 26:1      | 16315.2           | 9.8    | 13811.4           | 31.9   | 12645.9           | 50.6   | 14450.4           | 25.5   |
| PC 30:0      |                   |        | 461.0             | 37.2   | 346.1             | 44.7   | 521.6             | 42.4   |
| PC 30:1      |                   |        |                   |        |                   |        | 346.0             | 31.6   |
| PC 32:0      | 3279.0            | 37.3   | 4537.7            | 51.7   | 4368.3            | 45.2   | 7851.1            | 81.3   |
| PC 32:1      | 13926.8           | 56.4   | 13184.8           | 36.4   | 3377.4            | 17.0   | 3892.8            | 33.1   |
| PC 32:2      | 1862.0            | 42.9   | 1839.2            | 22.9   | 1237.2            | 21.2   | 2033.3            | 51.9   |
| PC 34:1      | 54391.3           | 16.3   | 56713.6           | 12.1   | 43037.2           | 11.1   | 45408.5           | 18.0   |
| PC 34:2      | 66018.3           | 8.5    | 70735.8           | 5.5    | 67013.0           | 8.2    | 64016.2           | 13.8   |

|          |         |       |         |      |         |      |         |      |
|----------|---------|-------|---------|------|---------|------|---------|------|
| PC 34:3  | 7288.3  | 36.7  | 7448.1  | 17.6 | 8741.8  | 27.3 | 6270.6  | 27.6 |
| PC 34:4  | 2898.5  | 38.5  | 2603.7  | 20.6 | 1547.7  | 16.3 | 997.0   | 27.4 |
| PC 34:5  | 471.3   | 57.7  | 426.8   | 11.0 |         |      |         |      |
| PC 36:0  |         |       |         |      |         |      | 419.2   | 31.6 |
| PC 36:1  | 7898.7  | 57.3  | 5728.5  | 33.8 | 6969.1  | 32.3 | 8198.2  | 55.4 |
| PC 36:2  | 37699.6 | 23.2  | 41875.7 | 11.1 | 54707.0 | 15.6 | 50875.0 | 19.2 |
| PC 36:3  | 19578.0 | 66.2  | 14857.9 | 29.3 | 54117.9 | 13.5 | 39005.0 | 30.6 |
| PC 36:4  | 43576.2 | 23.9  | 23436.0 | 8.4  | 53708.5 | 12.4 | 17932.3 | 27.6 |
| PC 36:5  | 7642.7  | 14.6  | 43538.4 | 8.5  | 7168.2  | 15.2 | 22586.3 | 35.6 |
| PC 36:6  | 2126.8  | 25.3  | 2842.6  | 9.8  | 2101.8  | 25.3 | 2344.6  | 19.8 |
| PC 38:1  | 201.4   | 173.2 | 409.9   | 40.8 | 478.9   | 14.6 | 429.0   | 23.4 |
| PC 38:2  | 1440.1  | 48.8  | 1459.4  | 18.7 | 1446.7  | 40.8 | 1148.9  | 36.5 |
| PC 38:3  | 3229.9  | 58.3  | 1989.9  | 31.3 | 14573.3 | 32.5 | 6066.9  | 60.1 |
| PC 38:4  | 21699.2 | 29.5  | 8511.0  | 20.8 | 41940.9 | 17.5 | 11106.9 | 37.4 |
| PC 38:5  | 9438.8  | 37.0  | 19060.3 | 22.9 | 39693.1 | 25.1 | 17142.9 | 40.2 |
| PC 38:6  | 38269.6 | 25.3  | 65190.7 | 2.9  | 27251.5 | 19.8 | 62401.7 | 9.4  |
| PC 38:7  | 3425.6  | 25.5  | 6822.0  | 7.4  | 3822.6  | 10.7 | 6462.8  | 22.2 |
| PC 38:8  | 946.8   | 41.8  | 4890.6  | 7.0  | 1010.3  | 29.0 | 2741.1  | 27.8 |
| PC 40:10 | 943.0   | 31.0  | 998.1   | 11.1 | 407.4   | 20.0 | 1139.4  | 21.5 |
| PC 40:3  |         |       |         |      | 387.1   | 17.5 |         |      |
| PC 40:4  | 911.8   | 39.0  | 462.7   | 40.8 | 1264.1  | 39.6 | 498.5   | 30.5 |
| PC 40:5  | 991.0   | 39.7  | 1282.6  | 29.7 | 5430.8  | 25.9 | 679.3   | 50.9 |
| PC 40:6  | 9695.0  | 28.4  | 26071.3 | 11.9 | 12134.6 | 27.0 | 37494.7 | 13.0 |
| PC 40:7  | 4508.9  | 29.3  | 5835.4  | 12.6 | 9151.3  | 18.5 | 23058.8 | 24.4 |
| PC 40:8  | 1690.6  | 32.5  | 5008.2  | 15.9 | 4029.3  | 15.1 | 5480.5  | 24.7 |
| PC 40:9  | 3929.8  | 11.6  | 5740.9  | 2.0  | 3020.8  | 13.8 | 5896.9  | 9.2  |
| PC 42:10 | 548.7   | 35.2  | 754.2   | 4.9  | 878.5   | 18.6 | 2158.4  | 18.2 |
| PC 42:11 | 0.0     |       | 714.9   | 24.9 | 456.2   | 26.3 | 1175.9  | 14.0 |
| PC 42:6  | 926.9   | 30.7  | 714.0   | 19.4 | 472.3   | 24.2 | 636.3   | 35.2 |
| PC 42:9  | 1065.0  | 24.9  | 2384.5  | 12.2 | 1241.7  | 19.8 | 3103.9  | 12.4 |
| PC 44:12 |         |       | 593.3   | 12.3 |         |      | 1088.3  | 34.0 |
| PE 32:0  |         |       |         |      |         |      | 358.2   | 18.5 |
| PE 32:1  |         |       |         |      |         |      | 545.3   | 30.1 |
| PE 34:1  | 703.4   | 35.9  | 536.5   | 34.6 | 674.5   | 19.1 | 627.7   | 31.2 |
| PE 34:2  | 3454.1  | 26.9  | 2842.2  | 19.1 | 4871.1  | 20.5 | 2385.3  | 49.6 |
| PE 34:3  | 529.8   | 57.7  |         |      | 568.0   | 28.1 | 369.2   | 31.6 |
| PE 36:1  | 1101.2  | 39.2  | 1165.1  | 20.9 | 667.5   | 33.8 | 775.3   | 53.9 |
| PE 36:2  | 2599.8  | 24.5  | 2819.2  | 14.4 | 4954.2  | 18.6 | 4010.2  | 37.8 |
| PE 36:3  | 1247.7  | 34.4  | 953.4   | 14.2 | 4418.9  | 16.5 | 2113.6  | 42.8 |
| PE 36:4  | 7920.4  | 46.7  | 2312.8  | 21.3 | 8504.4  | 21.1 | 1669.7  | 39.7 |
| PE 36:5  | 1198.3  | 37.4  | 3338.4  | 7.9  | 1036.0  | 17.7 | 1954.2  | 41.2 |
| PE 36:6  |         |       |         |      |         |      | 404.3   | 8.4  |
| PE 38:1  | 556.7   | 19.8  | 654.4   | 16.2 |         |      | 389.1   | 15.8 |
| PE 38:2  | 1034.7  | 30.8  | 1203.7  | 14.2 | 1007.0  | 14.5 | 853.9   | 28.4 |
| PE 38:3  |         |       | 380.2   | 7.6  |         |      | 449.1   | 12.3 |

|             |         |      |         |       |         |      |         |       |
|-------------|---------|------|---------|-------|---------|------|---------|-------|
| PE 38:4     | 18324.3 | 34.7 | 7423.8  | 11.8  | 27983.5 | 14.8 | 7699.9  | 49.6  |
| PE 38:5     | 4012.2  | 42.1 | 7062.7  | 11.6  | 17455.8 | 24.8 | 7449.5  | 34.5  |
| PE 38:6     | 14973.5 | 34.5 | 24081.4 | 6.8   | 12345.9 | 21.9 | 30262.5 | 21.7  |
| PE 38:7     | 1422.7  | 34.9 | 1210.9  | 12.1  | 1438.5  | 16.5 | 1621.7  | 26.8  |
| PE 38:8     |         |      | 540.1   | 3.3   |         |      | 439.1   | 13.3  |
| PE 40:2     | 476.5   | 20.3 | 550.2   | 20.9  | 383.8   | 18.6 | 370.7   | 9.4   |
| PE 40:4     | 909.2   | 28.4 | 616.3   | 11.9  | 1085.6  | 22.1 | 425.6   | 18.5  |
| PE 40:5     | 712.6   | 26.6 | 1187.5  | 10.1  | 3205.8  | 23.2 | 389.1   | 1.7   |
| PE 40:6     | 5700.7  | 32.2 | 13523.3 | 8.7   | 7542.8  | 21.4 | 24932.0 | 22.7  |
| PE 40:7     | 4302.5  | 33.7 | 4292.8  | 10.9  | 7472.2  | 16.4 | 13630.8 | 40.1  |
| PE 40:8     | 923.8   | 31.2 | 1298.7  | 7.7   | 2306.2  | 13.1 | 2151.5  | 31.6  |
| PE 40:9     | 955.7   | 8.9  | 1364.6  | 5.7   | 825.2   | 7.8  | 1750.4  | 8.5   |
| PE 42:11    |         |      | 587.9   | 9.7   |         |      | 991.3   | 22.6  |
| PE 42:6     | 577.4   | 18.5 | 1120.3  | 21.8  | 462.4   | 15.5 | 786.7   | 13.0  |
| PE 42:9     | 682.5   | 21.2 | 1279.4  | 4.9   | 749.4   | 13.6 | 1757.6  | 14.6  |
| PE 44:12    |         |      |         |       |         |      | 771.3   | 20.6  |
| PE 44:6     |         |      | 75.6    | 244.9 |         |      |         |       |
| PG 32:0     | 771.2   | 5.6  | 682.4   | 6.7   | 593.9   | 16.7 | 666.5   | 13.6  |
| PG 34:0     | 1412.7  | 11.8 | 1300.1  | 10.0  | 1227.6  | 12.9 | 1275.7  | 14.3  |
| PG 34:1     |         |      |         |       |         |      | 514.4   | 48.6  |
| PG 36:0     |         |      |         |       | 395.0   | 44.7 |         |       |
| PG 36:3     | 418.4   | 57.7 | 369.0   | 40.8  | 467.5   | 7.8  | 358.2   | 37.7  |
| PG 38:6     |         |      |         |       | 441.3   | 20.6 |         |       |
| PG 40:6     |         |      | 410.4   | 40.8  |         |      |         |       |
| PI 38:4     | 404.0   | 57.7 |         |       | 641.9   | 22.1 | 438.5   | 18.6  |
| PI 38:4+NH4 |         |      |         |       | 438.0   | 16.9 | 435.3   | 31.6  |
| PI 38:5     |         |      |         |       |         |      | 370.8   | 39.5  |
| PI 38:5+NH4 |         |      |         |       |         |      | 387.8   | 52.3  |
| PI 38:7     | 762.9   | 24.1 | 519.6   | 10.7  | 623.1   | 22.1 | 151.8   | 129.7 |
| PI 40:6     |         |      |         |       |         |      | 418.0   | 50.0  |
| PI 40:7     | 474.2   | 11.0 | 363.9   | 40.8  | 928.3   | 9.2  | 580.8   | 10.3  |
| PI 40:8     |         |      | 368.5   | 6.1   | 598.0   | 18.8 | 439.7   | 54.7  |
| PI 40:9     |         |      | 477.2   | 5.9   |         |      | 514.3   | 16.2  |
| PI 42:6     | 467.8   | 29.5 | 385.5   | 40.8  | 476.9   | 13.9 | 433.4   | 37.7  |

Average intensities of phospholipids with relative standard deviations (SD) of all TAG detected in cyclohexane extract of mouse liver using positive mass spectrometry ionization mode.

*(blank boxes mean not detected)*

*C – control; CP – control and n-3-PUFA; LPC – lysophosphatidylcholine; LPE – lysophosphatidylethanolamine; M – MCD diet; MCD – high fat methionine choline-deficient diet; MP – MCD diet + n-3-PUFA; PE – phosphatidylethanolamine; PC – phosphatidylcholine; PE – phosphatidylethanolamine; PG – phosphatidylglycerol; PI – phosphatidylinositol.*

**Table S2. The effect of n-3-PUFA on liver phospholipids - negative mass spectrometry ionization mode.**

|          | C                 |        | CP                |        | M                 |        | MP                |        |
|----------|-------------------|--------|-------------------|--------|-------------------|--------|-------------------|--------|
|          | average intensity | SD (%) |
| LPE 16:0 | 186.9             | 12.2   | 560.0             | 55.2   | 730.2             | 50.3   | 578.8             | 52.4   |
| LPE 16:1 |                   |        |                   |        | 87.8              | 17.0   |                   |        |
| LPE 18:0 | 241.3             | 16.4   | 702.4             | 59.3   | 1534.0            | 62.8   | 1474.9            | 56.2   |
| LPE 18:1 | 106.4             | 51.0   | 232.8             | 39.6   | 1543.1            | 38.9   | 642.8             | 56.4   |
| LPE 18:2 |                   |        | 88.0              | 35.7   | 206.8             | 46.5   | 102.6             | 50.4   |
| LPE 20:0 |                   |        | 66.9              | 40.8   | 85.9              | 21.4   | 75.5              | 21.9   |
| LPE 20:1 |                   |        |                   |        | 122.0             | 43.8   | 84.3              | 22.1   |
| LPE 20:2 | 111.5             | 7.6    | 125.0             | 5.8    | 142.4             | 7.9    | 125.4             | 6.8    |
| LPE 20:4 | 76.0              | 32.6   | 94.1              | 38.6   | 377.2             | 55.5   | 98.1              | 48.2   |
| LPE 22:6 | 86.8              | 25.6   | 585.4             | 32.7   | 255.7             | 56.1   | 550.3             | 60.8   |
| LPI 16:0 | 65.2              | 57.7   | 109.0             | 19.6   |                   |        | 75.8              | 15.2   |
| LPI 18:0 | 253.4             | 60.7   | 515.6             | 30.5   | 596.9             | 48.5   | 930.3             | 43.1   |
| LPI 18:1 |                   |        |                   |        | 171.0             | 19.4   | 120.6             | 40.6   |
| LPI 20:3 |                   |        |                   |        |                   |        | 87.1              | 31.6   |
| LPI 20:4 |                   |        | 66.6              | 29.1   | 234.6             | 39.3   | 82.0              | 25.8   |
| LPI 24:0 |                   |        | 48.7              | 40.8   |                   |        | 56.0              | 4.6    |
| LPI 24:1 | 50.8              | 57.7   | 53.3              | 7.1    | 62.9              | 8.6    | 62.9              | 8.2    |
| PE 32:1  | 49.6              | 57.7   |                   |        |                   |        |                   |        |
| PE 34:1  | 106.9             | 37.9   | 70.6              | 26.4   | 101.1             | 15.9   | 90.3              | 32.6   |
| PE 34:2  | 383.0             | 24.6   | 317.5             | 17.6   | 627.6             | 21.6   | 330.3             | 52.1   |
| PE 34:3  | 56.9              | 57.7   |                   |        | 73.8              | 28.0   | 0.0               |        |
| PE 36:1  | 100.1             | 32.0   | 101.7             | 22.0   | 118.0             | 18.6   | 125.7             | 40.6   |
| PE 36:2  | 332.8             | 22.0   | 343.7             | 14.2   | 751.3             | 18.7   | 576.8             | 40.7   |
| PE 36:3  | 140.0             | 36.5   | 105.9             | 11.9   | 551.4             | 15.4   | 284.1             | 46.8   |
| PE 36:4  | 806.1             | 41.0   | 229.8             | 16.7   | 1048.6            | 24.0   | 181.3             | 50.9   |
| PE 36:5  | 99.1              | 45.0   | 401.9             | 10.8   | 74.9              | 20.9   | 237.2             | 45.3   |
| PE 38:2  | 71.4              | 23.8   | 60.9              | 15.8   | 127.3             | 31.6   | 98.4              | 21.7   |
| PE 38:3  |                   |        |                   |        | 89.3              | 26.7   | 97.7              | 45.4   |
| PE 38:4  | 2071.9            | 36.8   | 806.9             | 18.1   | 3652.1            | 27.6   | 919.9             | 45.7   |
| PE 38:5  | 380.3             | 42.7   | 716.7             | 15.9   | 2003.7            | 20.2   | 822.2             | 40.3   |
| PE 38:6  | 1400.3            | 30.3   | 2543.7            | 5.8    | 1317.2            | 15.6   | 3319.5            | 32.7   |
| PE 38:7  | 70.2              | 39.2   | 78.4              | 12.0   | 84.3              | 14.7   | 155.3             | 33.1   |
| PE 40:4  | 83.3              | 30.6   |                   |        | 131.9             | 12.7   |                   |        |
| PE 40:5  | 86.1              | 57.7   | 92.8              | 14.4   | 538.4             | 27.4   |                   |        |
| PE 40:6  | 712.5             | 35.6   | 1517.8            | 10.5   | 1230.9            | 18.9   | 3743.6            | 34.9   |

|          |        |      |        |      |        |       |        |      |
|----------|--------|------|--------|------|--------|-------|--------|------|
| PE 40:7  | 222.1  | 33.4 | 319.6  | 10.3 | 611.1  | 9.6   | 1454.0 | 35.9 |
| PE 40:8  | 53.7   | 57.7 | 52.8   | 40.8 | 88.5   | 19.4  | 140.3  | 44.4 |
| PE 42:1  |        |      |        |      | 97.8   | 44.7  | 75.5   | 31.6 |
| PE 42:6  | 49.8   | 57.7 | 69.7   | 20.0 | 73.1   | 24.4  | 89.8   | 26.0 |
| PE 42:7  |        |      |        |      |        |       | 90.4   | 41.2 |
| PG 34:1  | 95.9   | 33.8 | 82.9   | 11.9 | 122.2  | 12.2  | 101.0  | 40.3 |
| PG 34:2  |        |      |        |      |        |       | 76.8   | 31.6 |
| PG 36:2  |        |      |        |      | 110.7  | 11.6  | 70.7   | 15.7 |
| PG 36:3  |        |      |        |      | 148.1  | 10.8  | 113.6  | 31.6 |
| PG 36:4  |        |      |        |      | 94.8   | 11.8  | 75.2   | 36.8 |
| PG 38:4  |        |      |        |      | 64.2   | 44.7  |        |      |
| PG 38:5  |        |      |        |      | 60.5   | 44.7  |        |      |
| PG 40:6  |        |      |        |      | 108.7  | 24.0  |        |      |
| PG 40:7  |        |      |        |      | 84.9   | 9.2   | 73.3   | 29.4 |
| PG 40:8  |        |      |        |      |        |       | 81.2   | 31.6 |
| PG 44:10 |        |      |        |      | 55.1   | 44.7  |        |      |
| PG 44:12 |        |      | 113.5  | 40.7 | 0.0    |       | 208.4  | 49.9 |
| PI 34:2  | 131.7  | 43.9 | 196.1  | 16.9 | 96.2   | 44.4  | 126.3  | 51.2 |
| PI 36:2  | 106.2  | 39.2 | 126.5  | 13.9 | 179.9  | 41.0  | 231.6  | 36.5 |
| PI 36:3  |        |      | 55.7   | 14.4 | 108.4  | 32.4  | 110.4  | 45.3 |
| PI 36:4  | 898.5  | 73.0 | 546.0  | 17.7 | 554.0  | 39.9  | 267.3  | 53.9 |
| PI 36:5  |        |      | 135.0  | 16.2 |        |       | 99.1   | 41.5 |
| PI 38:3  |        |      |        |      |        |       | 355.9  | 31.6 |
| PI 38:4  | 2792.3 | 46.6 | 2119.3 | 19.8 | 8429.6 | 32.8  | 4353.8 | 36.5 |
| PI 38:5  | 121.0  | 52.1 | 391.4  | 25.2 | 946.2  | 22.9  | 943.4  | 37.9 |
| PI 38:6  | 61.8   | 57.7 | 138.3  | 15.9 |        |       | 202.8  | 38.3 |
| PI 40:3  | 130.8  | 25.7 | 119.2  | 23.7 | 153.5  | 26.3  | 153.8  | 22.0 |
| PI 40:4  | 59.2   | 21.5 | 65.7   | 40.8 | 94.3   | 30.1  | 89.8   | 50.1 |
| PI 40:5  |        |      | 72.3   | 23.2 | 85.7   | 21.3  | 166.6  | 34.6 |
| PI 40:6  | 66.9   | 57.7 | 215.7  | 36.6 |        |       | 715.3  | 47.9 |
| PI 40:7  |        |      |        |      |        |       | 101.4  | 42.5 |
| PI 44:12 |        |      |        |      | 18.6   | 223.6 |        |      |

Average intensities of phospholipids with relative standard deviations (SD) of all glycerophospholipids detected in cyclohexane extract of mouse liver using negative mass spectrometry ionization mode.

*C* – control; *CP* – control and *n*-3-PUFA; *LPC* – lysophosphatidylcholine; *LPE* – lysophosphatidylethanolamine; *M* – MCD diet; *MCD* – high fat methionine choline-deficient diet; *MP* – MCD diet + *n*-3-PUFA; *PE* – phosphatidylethanolamine; *PC* –

*phosphatidylcholine; PE – phosphatidylethanolamine; PG – phosphatidylglycerol; PI – phosphatidylinositol.*

*(blank boxes mean not detected)*
